# Supplementary material for: Size-dependent adhesion energy of shape-selected Pd and Pt nanoparticles
Source: Royal Society of Chemistry journal article supplement (doi:10.1039/c6nr02166b), 2016-01-01
Supplement: c6nr02166b1.pdf [file c6nr02166b1.pdf]

## Supporting Online Information

### Size-Dependent Adhesion Energy of Shape-Selected Pd and Pt Nanoparticles

M. Ahmadi<sup>1</sup>, F. Behafarid<sup>1</sup>, B. Roldan Cuenya<sup>2\*</sup>

<sup>1</sup>Department of Physics, University of Central Florida, Orlando, FL 32816, USA

<sup>2</sup>Department of Physics, Ruhr-University Bochum, 44780 Bochum, Germany

\*e-mail: [Beatriz.Roldan@rub.de](mailto:Beatriz.Roldan@rub.de)

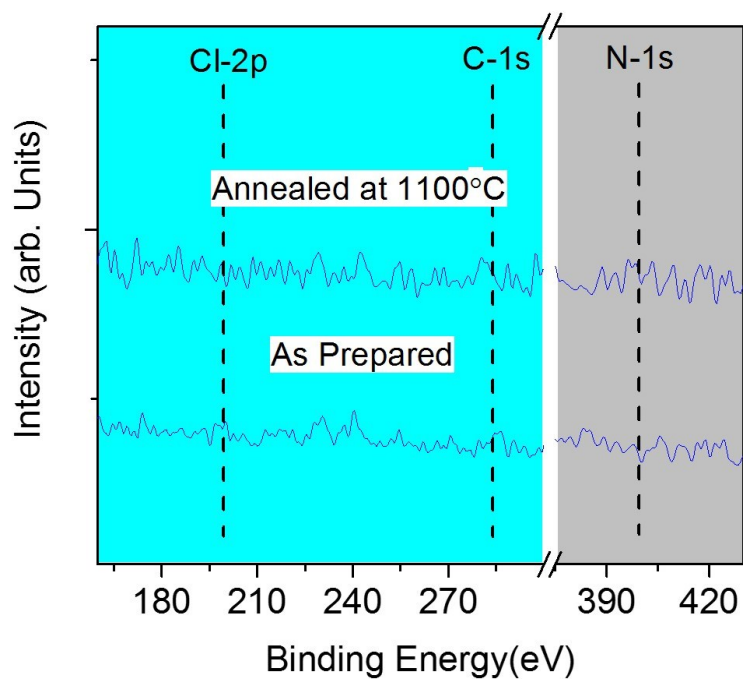

**Suppl. Fig. S1:** XPS spectra of the Cl-2p, C-1s and N-1s core level regions of a Pd NP/TiO<sub>2</sub>(110) sample acquired at 25°C on the as-prepared sample (O<sub>2</sub>-plasma treated) and the same sample after annealing at 1100°C in UHV.

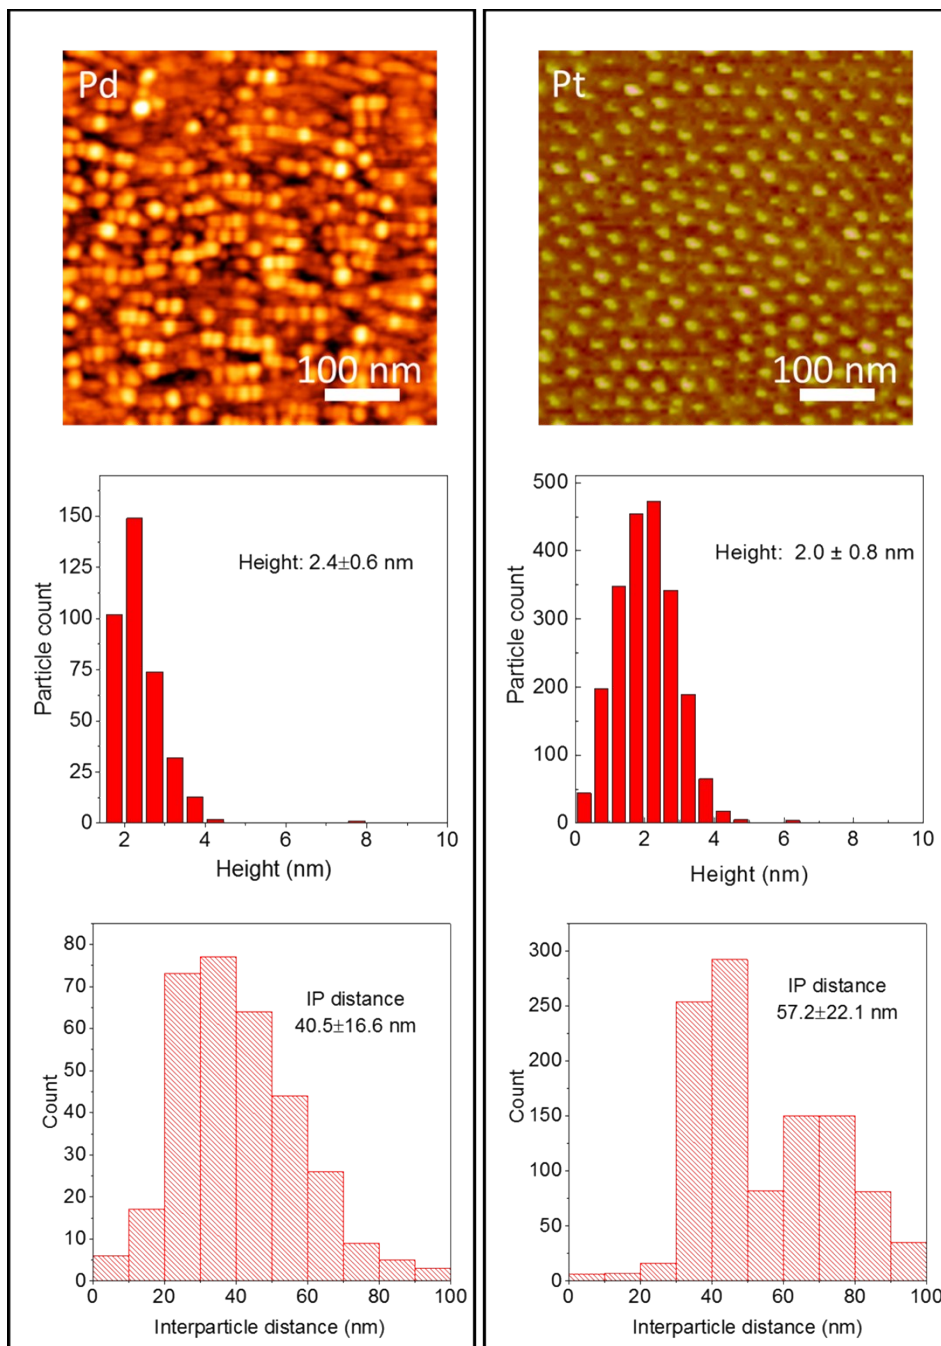

**Suppl. Fig. S2** 500×500 nm AFM images of micellar (a) Pd and (b) Pt NPs supported on SiO<sub>2</sub>/Si (001) after oxygen plasma, their particle height distribution and their interparticle distance distribution extracted from the analysis of AFM images.

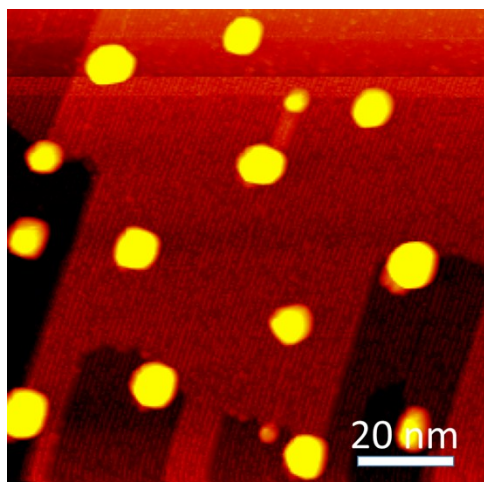

**Suppl. Fig. 3:** 100×100 nm STM image of micellar Pt NPs supported on TiO<sub>2</sub>(110). The image was acquired at 25°C after annealing at 1100°C.

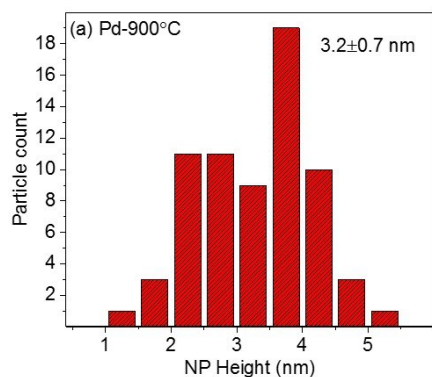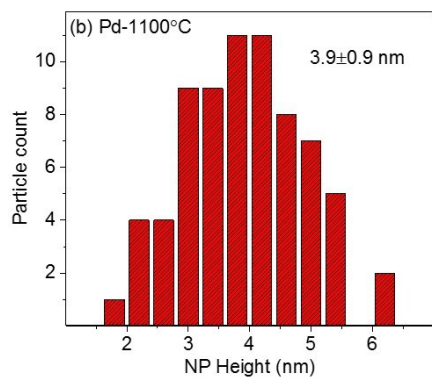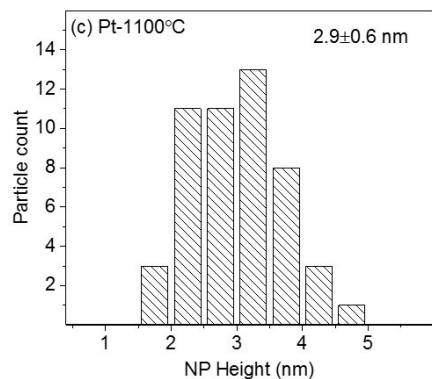

**Suppl. Fig. S4:** Particle height distribution of (a) Pd NPs supported on TiO<sub>2</sub>(110) after annealing at 900°C for 5 hours, (b) Pd NPs supported on TiO<sub>2</sub>(110) after annealing at 1100°C for 20 min and (c) Pt NPs supported on TiO<sub>2</sub>(110) after annealing at 1100°C for 20 min extracted from STM measurements acquired at 25°C.

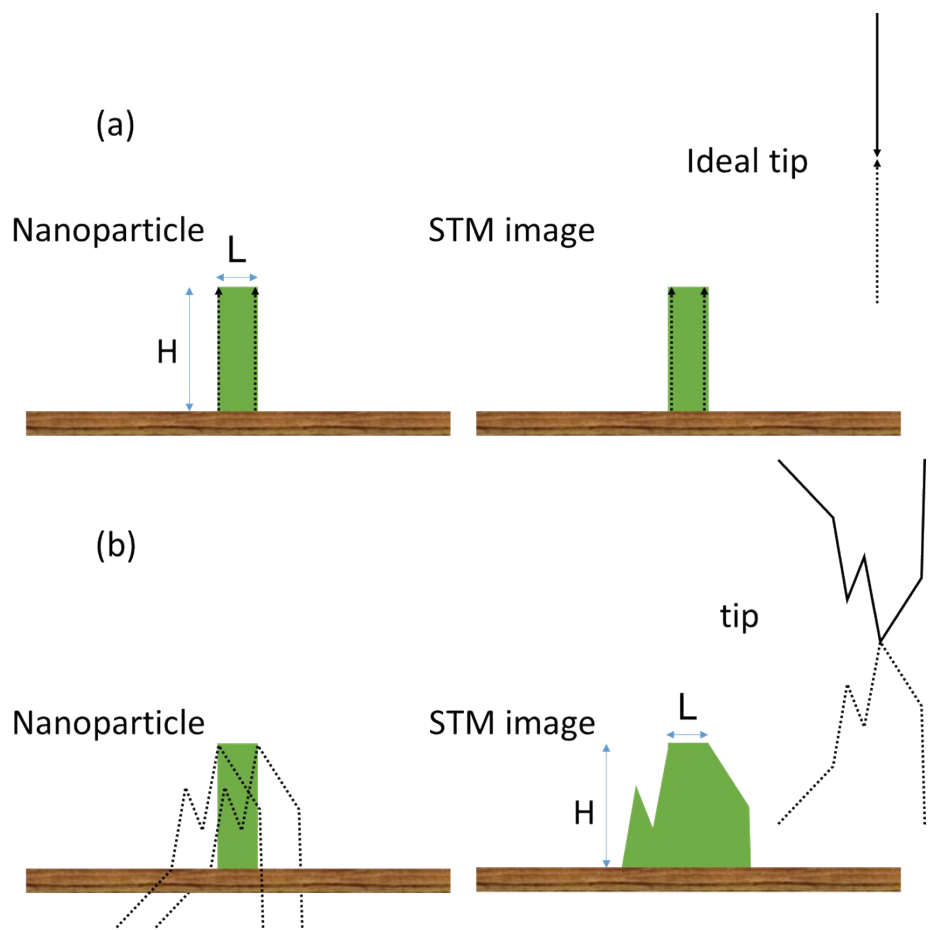

**Suppl. Fig. S5:** Schematic STM image of (a) an ideal tip, and (b) a real tip.

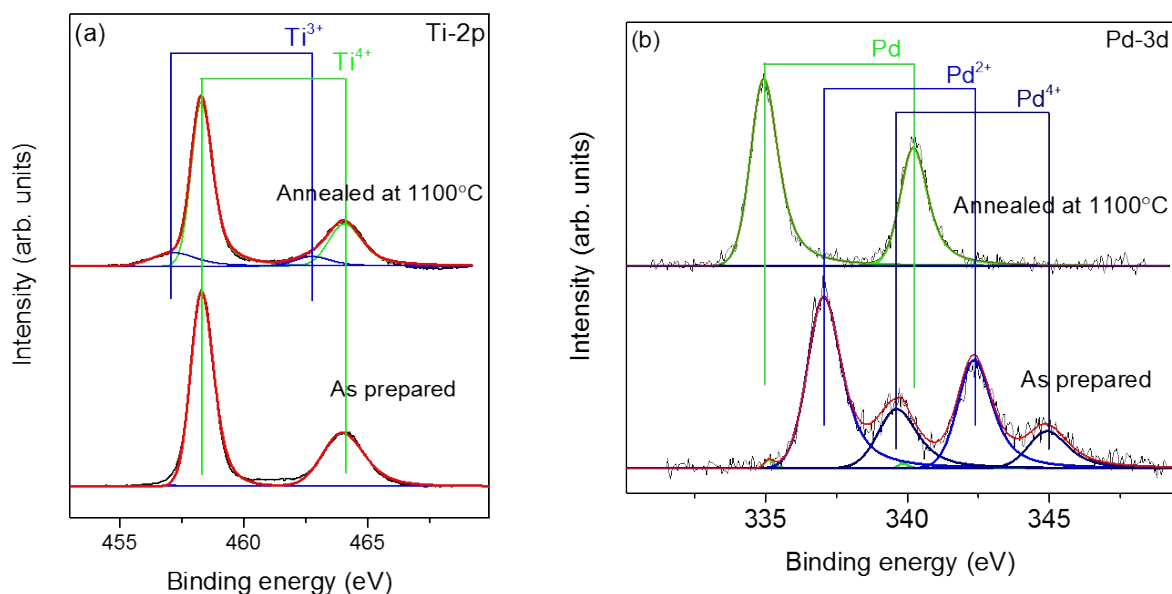

**Suppl. Fig. S6:** XPS spectra of the (a) Ti-2p and (b) Pd-3d core level region of Pd NP/TiO<sub>2</sub>(110) acquired at 25°C on the as-prepared sample (O<sub>2</sub>-plasma treated) and the same sample after annealing at 1100°C in UHV. The Ti-2p region has been fitted with two doublets corresponding to Ti<sup>3+</sup> (2p<sub>3/2</sub>, 457.2 eV) and Ti<sup>4+</sup> (2p<sub>3/2</sub>, 458.3 eV). The presence of Ti<sup>3+</sup> in the sample after the thermal treatment is due to the increase in oxygen vacancies on the surface. The Pd-3d region of the as prepared sample has been fitted by three doublets corresponding to Pd metallic (3d<sub>5/2</sub>, 335 eV), Pd<sup>2+</sup> (3d<sub>5/2</sub>, 337 eV), Pd<sup>4+</sup> (3d<sub>5/2</sub>, 339.6 eV). After annealing at 1100°C, just metallic Pd has been observed, which rules out the formation of Pd-Ti after annealing in UHV.
